# Supplementary material for: Validation for the function of protein C in mouse models
Source: PeerJ. 2024 Apr 24;12:e17261. doi: 10.7717/peerj.17261 (PMC11055512; doi:10.7717/peerj.17261)
Supplement: Supplemental Information 1 [file peerj-12-17261-s001.xlsx]

## Sheet:  Figure8
Figure. 8A. Activity levels of PC					Figure. 8B. Antigen levels of PC
PC(+/+) group	Activity levels of PC	PC(+/-) group	Activity levels of PC		PC(+/+) group	Activity levels of PC	PC(+/-) group	Activity levels of PC
PC(+/+)1	126	PC(+/-)1	106		PC(+/+)1	9.2	PC(+/-)1	8.9
PC(+/+)2	132	PC(+/-)2	150		PC(+/+)2	9.2	PC(+/-)2	11
PC(+/+)3	118	PC(+/-)3	150		PC(+/+)3	8.5	PC(+/-)3	11.4
PC(+/+)4	152	PC(+/-)4	124		PC(+/+)4	11.1	PC(+/-)4	9.8
PC(+/+)5	196	PC(+/-)5	90		PC(+/+)5	10.6	PC(+/-)5	10.6
PC(+/+)6	106	PC(+/-)6	144		PC(+/+)6	11.7	PC(+/-)6	15.9
PC(+/+)7	154	PC(+/-)7	138		PC(+/+)7	11.6	PC(+/-)7	9.5
PC(+/+)8	130	PC(+/-)8	106		PC(+/+)8	11	PC(+/-)8	10.6
PC(+/+)9	158	PC(+/-)9	138		PC(+/+)9	9.4	PC(+/-)9	10.7
PC(+/+)10	122	PC(+/-)10	72		PC(+/+)10	12.6	PC(+/-)10	10.3
PC(+/+)11	150	PC(+/-)11	62		PC(+/+)11	12.7	PC(+/-)11	10.8
PC(+/+)12	174	PC(+/-)12	68		PC(+/+)12	10.3	PC(+/-)12	10.1
PC(+/+)13	182	PC(+/-)13	102		PC(+/+)13	8.8	PC(+/-)13	8.7
PC(+/+)14	128	PC(+/-)14	74		PC(+/+)14	10.5	PC(+/-)14	9
PC(+/+)15	172	PC(+/-)15	96		PC(+/+)15	9.4	PC(+/-)15	9.6
PC(+/+)16	114	PC(+/-)16	114		PC(+/+)16	8.5	PC(+/-)16	9.2
PC(+/+)17	192	PC(+/-)17	72		PC(+/+)17	10.5	PC(+/-)17	10
PC(+/+)18	170	PC(+/-)18	44		PC(+/+)18	11.1	PC(+/-)18	10.3
PC(+/+)19	174	PC(+/-)19	60		PC(+/+)19	14.1	PC(+/-)19	13
PC(+/+)20	108	PC(+/-)20	32		PC(+/+)20	8.1	PC(+/-)20	13
PC(+/+)21	76				PC(+/+)21	10.9
PC(+/+)22	78				PC(+/+)22	9.4
PC(+/+)23	100				PC(+/+)23	9.3
PC(+/+)24	68				PC(+/+)24	10.9
average value	136.667		97.1		average value	10.3917		10.62
Standard Deviation	36.0725		35.1367		Standard Deviation	1.458		1.66

## Sheet: Table 3 
Results of routine blood tests (expressed by )
PC(+/+) group	Prythrocyte（10^12/L）	Hemoglobin concentration（g/L）	Peukocyte（10^9/L）	Platelet（10^9/L）	Lymphocyte percentage（%）	Monocyte percentage（%）	Eosinophil percentage（%）	Basophil percentage（%）	Neutrophil percentage（%）
PC(+/+)1	7.45	125	1.26	501	37.7	15.3	1.3	0.7	45
PC(+/+)2	8.06	137	1.69	407	65.7	14.1	0.2	0.2	19.8
PC(+/+)3	7.34	124	2.4	498	59.6	19.4	0.4	0.9	19.7
PC(+/+)4	7.04	119	0.76	467	62.7	16.7	0.2	0.6	19.8
PC(+/+)5	7.19	124	1	493	55.9	20.1	1.4	1.2	21.4
average value	7.416	125.8	1.422	473.2	56.32	17.12	0.7	0.72	25.14
Standard Deviation	0.350463	5.97997	0.57808	35.2159	9.86233	2.31032	0.536656	0.331059	9.9502
PC(+/-) group	Prythrocyte（10^12/L）	Hemoglobin concentration（g/L）	Peukocyte（10^9/L）	Platelet（10^9/L）	Lymphocyte percentage（%）	Monocyte percentage（%）	Eosinophil percentage（%）	Basophil percentage（%）	Neutrophil percentage（%）
PC(+/-)1	7.61	129	2.1	414	56	22	0.2	1.2	20.6		Project	PC(+/+) group	PC(+/-) group
PC(+/-)2	7.61	124	4.08	299	54.3	18.8	0.7	1	25.2		Prythrocyte（10^12/L）	7.42±0.35	7.22±0.38
PC(+/-)3	7.5	125	1.49	431	68.1	15.7	0.5	0.6	15.1		Hemoglobin concentration（g/L）	125.80±5.98	119.21±8.52
PC(+/-)4	6.97	114	0.69	548	52.7	21.9	0.7	0.6	24.1		Peukocyte（10^9/L）	1.42±0.58	1.54±0.95
PC(+/-)5	7.4	122	0.58	299	49	21.5	1.4	1.4	26.7		Platelet（10^9/L）	473.20±35.22	513.79±132.18
PC(+/-)6	7.35	123	1.12	594	40	18.8	0.2	0.3	40.7		Lymphocyte percentage（%）	56.32±9.86	51.83±13.28
PC(+/-)7	7.27	120	1.19	757	46.2	24.7	0.5	0.1	28.5		Monocyte percentage（%）	17.12±2.31	15.68±5.42
PC(+/-)8	6.79	115	0.97	562	42.7	20.9	0.1	0.4	35.9		Eosinophil percentage（%）	0.70±0.54	0.69±0.84
PC(+/-)9	5.99	91	0.44	515	44	7.7	0.3	0.3	47.7		Basophil percentage（%）	0.72±0.33	0.63±0.48
PC(+/-)10	7.38	122	2.06	461	59	21.2	0.2	1	18.6		Neutrophil percentage（%）	25.14±9.95	31.17±12.83
PC(+/-)11	7.57	123	1.87	555	36.1	13.9	0.5	0.4	49.1
PC(+/-)12	7.31	123	3.5	552	42.6	14.7	0.9	0.7	41.1
PC(+/-)13	7.35	111	1.35	615	81	5.6	0.2	0.2	13
PC(+/-)14	7.17	112	2.37	445	42.6	13.3	3.9	1.9	38.3
PC(+/-)15	7.23	111	0.65	522	76.3	8.4	0.4	0	14.9
PC(+/-)16	6.64	125	1.61	600	56.7	10.2	1.3	0.8	31
PC(+/-)17	7.33	127	0.71	745	55.7	14.8	0.6	0.6	28.3
PC(+/-)18	7.19	124	0.96	257	24.4	11.8	0.5	0.1	63.2
PC(+/-)19	7.51	124	1.57	591	57.3	12	0.1	0.3	30.3
average value	7.21947	119.211	1.54263	513.789	51.8263	15.6789	0.694737	0.626316	31.1737
Standard Deviation	0.384153	8.51982	0.946311	132.177	13.2847	5.42184	0.835699	0.482147	12.8306

## Sheet: Table 4
Table 4 Results of the four coagulation items (expressed by )
PC(+/+) group	PT（sec）	APTT（sec）	TT（s）	FIB（g/L）
PC(+/+)6	7.9	29.2	26.9	1.1
PC(+/+)7	9.6	38.6	38.3	1.1
PC(+/+)8	9.4	37.6	25.8	1.1
PC(+/+)9	9.3	24.6	27	1
PC(+/+)10	9.3	28.5	25.5	1.3
PC(+/+)11	26.6	13.4	26.7	1
PC(+/+)12	8.9	18.1	38.4	0.9
PC(+/+)13	9.7	30.1	36.7	1.2
PC(+/+)14	9.3	32	30.5	1.6
PC(+/+)15	9.7	28	26.4	1.3
PC(+/+)16	10.1	24.6	28.8	1.1
PC(+/+)17	9.1	17.2	32.6	1.1
PC(+/+)18	10	26.6	27.9	1.2
PC(+/+)19	9.9	41.6	35	1.1
PC(+/+)20	9.3	27.6	28.4	1.5
average value	10.54	27.8467	30.3267	1.17333
Standard Deviation	4.32278	7.59068	4.49822	0.180616
Table 4 Results of the four coagulation items (expressed by )
Project	PC(+/+) group	PC(+/-) group
PT（sec）	10.5±4.3	—
APTT（sec）	27.8±7.6	—
TT（sec）	30.3±4.5	—
FIB（g/L）	1.2±0.2	—
— indicates that there is no solidification reaction, and the value cannot be obtained
